# Supplementary material
Source: PubMed Central journal article supplement (PMC2637010)
Supplement: supp_90735.2008_tableS1.pdf [file supp_90735.2008_tableS1.pdf]

**Table 1. Transfer of Gaze, Saccade, Head Contribution, and Total Head Amplitude between Pre- and Post Transfer Phases**

| Experiment | Condition         | Eye Position | Gaze Ratio (Amp) | Eye Ratio (Amp)     | Head Cont Ratio (Amp) | Total Head Ratio (Amp) |                      |
|------------|-------------------|--------------|------------------|---------------------|-----------------------|------------------------|----------------------|
| P1         | <b>(Backward)</b> | PreTrans     | Center           | ---- (33.6 ± 4.0)   | ---- (26.0 ± 3.4)     | ---- (7.6 ± 2.6)       | ---- (20.0 ± 3.7)    |
|            |                   | PostTrans    | Left             | 1.13 (37.8 ± 2.5) * | 1.3 (35.9 ± 2.2) *    | 0.30 (1.9 ± 0.5) *     | 0.51 (4.3 ± 1.5) *   |
|            |                   | PostTrans    | Right            | 0.94 (31.7 ± 4.2)   | 0.52 (13.6 ± 2.1) *   | 2.39 (18.0 ± 4.0) *    | 5.50 (41.6 ± 3.9) *  |
| P3         | <b>(Backward)</b> | PreTrans     | Center           | ---- (31.9 ± 3.0)   | ---- (26.0 ± 2.4)     | ---- (5.9 ± 1.1)       | ---- ( 18.4 ± 2.6)   |
|            |                   | PostTrans    | Left             | 1.07 (34.2 ± 3.1)   | 1.27 (32.9 ± 2.8) *   | 0.21 ( 1.3 ± 0.5) *    | 0.16 ( 2.9 ± 1.6) *  |
|            |                   | PostTrans    | Right            | 0.92 (29.4 ± 2.8)   | 0.42 (13.4 ± 2.2) *   | 2.69 ( 16.0 ± 2.0) *   | 2.25 (41.3 ± 2.5) *  |
| P4         | <b>(Backward)</b> | PreTrans     | Left             | ---- (32.2 ± 1.9)   | ---- (30.8 ± 2.1)     | ---- (1.4 ± 0.6)       | ---- (4.0 ± 2.3)     |
|            |                   | PostTrans    | Center           | 0.99 (31.9 ± 2.7)   | 0.82 (25.2 ± 2.3) *   | 4.87 (6.7 ± 1.0) *     | 5.73 (23.0 ± 2.0) *  |
|            |                   | PostTrans    | Right            | 1.01 (32.6 ± 2.5)   | 0.51 (15.7 ± 2.7) *   | 12.21 (16.9 ± 2.3) *   | 10.31 (41.4 ± 2.6) * |
| P10        | <b>(Backward)</b> | PreTrans     | Center           | ---- (31.3 ± 4.0)   | ---- (22.3 ± 3.7)     | ---- (9.0 ± 3.2)       | ---- (23.6 ± 4.0)    |
|            |                   | PostTrans    | Left             | 1.17 (33.7 ± 1.5)   | 1.54 (34.4 ± 1.6) *   | 0.42 (2.3 ± 1.0) *     | 0.38 (5.9 ± 2.7) *   |
|            |                   | PostTrans    | Right            | 1.01 (31.7 ± 3.6)   | 0.59 (13.1 ± 2.9) *   | 2.05 (18.5 ± 3.0) *    | 1.77 (41.7 ± 3.9) *  |
| P15        | <b>(Backward)</b> | PreTrans     | Center           | ---- (31.9 ± 3.0)   | ---- (26.0 ± 2.4)     | ---- (5.9 ± 1.1)       | ---- ( 18.4 ± 2.6)   |
|            |                   | PostTrans    | Left             | 1.09 (32.0 ± 3.8)   | 1.29 (30.3 ± 3.2) *   | 0.28 (1.6 ± 1.0) *     | 0.19 (3.9 ± 2.5) *   |
|            |                   | PostTrans    | Right            | 1.01 (29.6 ± 5.2)   | 0.63 (14.9 ± 3.0) *   | 2.56 (14.7 ± 3.4) *    | 1.99 (39.8 ± 3.2) *  |
| P16        | <b>(Backward)</b> | PreTrans     | Center           | ---- (29.5 ± 4.0)   | ---- (23.2 ± 2.9)     | ---- (6.3 ± 1.8)       | ---- (22.0 ± 3.8)    |
|            |                   | PostTrans    | Left             | 1.08 (31.8 ± 4.3)   | 1.31 (30.4 ± 4.0) *   | 0.23 (1.5 ± 0.7) *     | 0.24 (5.5 ± 3.3) *   |
|            |                   | PostTrans    | Right            | 1.09 (32.4 ± 4.6)   | 0.64 (14.9 ± 2.2) *   | 2.78 (17.5 ± 4.6) *    | 1.89 (42.6 ± 4.1) *  |
| Q2         | <b>(Backward)</b> | PreTrans     | Center           | ---- (29.2 ± 2.1)   | ---- (25.8 ± 2.0)     | ---- (3.4 ± 1.0)       | ---- (18.7 ± 2.0)    |
|            |                   | PostTrans    | Left             | 1.09 (31.7 ± 2.2) * | 1.19 (30.7 ± 2.2) *   | 0.32 (1.1 ± 0.3) *     | 0.21 (3.9 ± 1.6) *   |
|            |                   | PostTrans    | Right            | 1.12 (32.8 ± 2.3) * | 0.95 (24.5 ± 1.4)     | 2.41 (8.2 ± 1.2) *     | 1.76 (33.0 ± 1.9) *  |
| S2         | <b>(Backward)</b> | PreTrans     | Center           | ---- (38.2 ± 1.3)   | ---- (26.9 ± 1.6)     | ---- (11.2 ± 2.2)      | ---- (28.3 ± 2.6)    |
|            |                   | PostTrans    | Left             | 0.99 (37.9 ± 1.6)   | 1.13 (30.4 ± 2.1) *   | 0.67 (7.5 ± 1.1) *     | 0.61 (17.4 ± 1.7) *  |
|            |                   | PostTrans    | Right            | 0.80 (30.6 ± 4.2) * | 0.57 ( 15.3 ± 3.1) *  | 1.35 (15.2 ± 2.6) *    | 1.37 (38.9 ± 2.0) *  |
| P11        | <b>(Forward)</b>  | PreTrans     | Center           | ---- (33.3 ± 2.6)   | ---- (31.9 ± 2.3)     | ---- (1.4 ± 0.6)       | ---- (20.7 ± 3.3)    |
|            |                   | PostTrans    | Left             | 0.81 (27.0 ± 1.1) * | 0.85 (27.0 ± 1.1)     | 0.04 (0.1 ± 0.1) *     | 0.00 (0.1 ± 0.1) *   |
|            |                   | PostTrans    | Right            | 1.14 (37.9 ± 2.3) * | 0.94 (30.1 ± 0.7)     | 5.77 (7.8 ± 2.0) *     | 1.32 (38.5 ± 1.9)    |
| P12        | <b>(Forward)</b>  | PreTrans     | Center           | ---- (31.9 ± 3.4)   | ---- (26.3 ± 2.2)     | ---- (5.6 ± 2.9)       | ---- (35.3 ± 2.7)    |
|            |                   | PostTrans    | Left             | 0.84 (26.7 ± 0.7) * | 1.01 (26.5 ± 0.7) *   | 0.06 (0.3 ± 0.2) *     | 0.34 ( 12.0 ± 7.6) * |
|            |                   | PostTrans    | Right            | 1.25 (40.0 ± 3.3) * | 0.69 (18.2 ± 1.4) *   | 3.88 (21.8 ± 3.7) *    | 1.41 (49.9 ± 3.4) *  |
| P14        | <b>(Forward)</b>  | PreTrans     | Center           | ---- (38.2 ± 7.3)   | ---- (31.1 ± 3.3)     | ---- (7.1 ± 4.5)       | ---- (32.9 ± 3.3)    |
|            |                   | PostTrans    | Left             | 0.75 (28.9 ± 3.4) * | 0.92 (28.8 ± 3.1)     | 0.05 (0.3 ± 0.3) *     | 0.13 (4.4 ± 6.3) *   |
|            |                   | PostTrans    | Right            | 1.10 (42.2 ± 3.4)   | 0.67 (20.8 ± 2.0) *   | 3.01 (21.4 ± 3.2) *    | 1.53 (50.2 ± 2.9) *  |
| Q4         | <b>(Forward)</b>  | PreTrans     | Center           | ---- (28.5 ± 1.5)   | ---- ( 26.3 ± 1.3)    | ---- (2.2 ± 0.6)       | ---- (38.9 ± 2.9)    |
|            |                   | PostTrans    | Left             | 0.95 (27.0 ± 0.9) * | 0.98 (25.8 ± 0.8)     | 0.58 (1.2 ± 0.9) *     | 0.62 (24.3 ± 1.6) *  |
|            |                   | PostTrans    | Right            | 1.13 (32.2 ± 1.4) * | 1.06 (27.9 ± 1.1) *   | 2.01 (4.3 ± 0.8) *     | 1.32 (51.5 ± 2.0) *  |
| S5         | <b>(Forward)</b>  | PreTrans     | Center           | ---- (33.0 ± 1.5)   | ---- (23.9 ± 2.2)     | ---- (9.1 ± 3.1)       | ---- (43.4 ± 1.8)    |
|            |                   | PostTrans    | Left             | 0.84 (27.8 ± 1.3) * | 1.11 (26.4 ± 0.9) *   | 0.15 (1.3 ± 0.6) *     | 0.47 ( 23.7 ± 2.0) * |
|            |                   | PostTrans    | Right            | 1.07 (35.5 ± 1.7) * | 0.69 (16.4 ± 1.9) *   | 2.11 (19.1 ± 2.5) *    | 1.40 (60.7 ± 2.4) *  |

\* indicates significantly different than initial eye position values (two-tailed t-test)
