# Supplementary material
Source: PubMed Central journal article supplement (PMC2637010)
Supplement: supp_90735.2008_tableS2.pdf [file supp_90735.2008_tableS2.pdf]

Table 2- Gaze Adaptation Trial Constants

| Backward    |                |                | Forward     |                |                |
|-------------|----------------|----------------|-------------|----------------|----------------|
| Experiments | Trial Constant | R <sup>2</sup> | Experiments | Trial Constant | R <sup>2</sup> |
| P1          | 63.3           | 0.98           | P5          | N/A            | N/A            |
| P2          | 277.8          | 0.98           | P6          | 200            | 0.98           |
| P3          | 50.2           | 0.98           | P9          | 64.1           | 0.96           |
| P4          | 153.8          | 0.99           | P11         | 90.9           | 0.98           |
| P7          | 25             | 0.97           | P12         | 333.3          | 0.97           |
| P8          | 76.9           | 0.99           | P14         | 114.9          | 0.97           |
| P10         | 70.4           | 0.99           | Q3          | 217.4          | 0.98           |
| P13         | 79.4           | 0.99           | Q4          | 322.6          | 0.99           |
| P15         | 53.8           | 0.98           | S2          | 196.1          | 0.98           |
| P16         | 28.8           | 0.98           | S5          | 526.3          | 0.99           |
| Q1          | 47.4           | 0.99           | S7          | 303            | 0.98           |
| Q2          | 53.7           | 0.99           |             |                |                |
| Q5          | 92.6           | 0.99           |             |                |                |
| S1          | 500            | 0.99           |             |                |                |
| S3          | 125            | 0.99           |             |                |                |
| S6          | 100            | 0.99           |             |                |                |
| S8          | 169.5          | 0.99           |             |                |                |
| Mean ± SD   | 115.7 ± 117.0  | 0.99 ± 0.006   | Mean ± SD   | 236.9 ± 139.1  | 0.98 ± 0.009   |
