# Supplementary material
Source: PubMed Central journal article supplement (PMC2637010)
Supplement: supp_90735.2008_tableS3.pdf [file supp_90735.2008_tableS3.pdf]

Supplementary Table 3- Head-Restrained Summary Data

| Experiment             | $\Delta$ Gaze Amp<br>(Adapt-Pre) | $\Delta$ Gaze Amp<br>(Probe-Pre) | $\Delta$ Gaze Amp<br>(PostProbe-Pre) | Rate            | R <sup>2</sup>    |      |
|------------------------|----------------------------------|----------------------------------|--------------------------------------|-----------------|-------------------|------|
| Backward<br>Adaptation | HR-P1                            | -16.6 $\pm$ 1.8                  | -15.9 $\pm$ 2.4                      | -15.7 $\pm$ 2.0 | 322.6             | 0.99 |
|                        | HR-P4                            | -12.6 $\pm$ 1.5                  | -12.3 $\pm$ 2.2                      | -12.0 $\pm$ 1.7 | 161.3             | 0.99 |
|                        | HR-Q2                            | -16.4 $\pm$ 2.0                  | -17.4 $\pm$ 2.2                      | -15.5 $\pm$ 3.1 | 217.4             | 0.99 |
|                        | HR-Q4                            | -17.7 $\pm$ 2.4                  | -16.6 $\pm$ 2.0                      | -15.1 $\pm$ 1.8 | 133.3             | 0.99 |
|                        | <i>Mean (<math>\pm</math>SD)</i> | -15.8 $\pm$ 2.2                  | -15.6 $\pm$ 2.3                      | -14.6 $\pm$ 1.7 | 208.7 $\pm$ 83.6  | 0.99 |
| Forward<br>Adaptation  | HR-P2                            | 6.3 $\pm$ 1.4                    | 5.9 $\pm$ 1.7                        | 5.8 $\pm$ 1.8   | 833.3             | 0.99 |
|                        | HR-P3                            | 7.2 $\pm$ 1.4                    | 6.6 $\pm$ 1.2                        | 5.6 $\pm$ 1.2   | 370.4             | 0.99 |
|                        | HR-Q1                            | 8.9 $\pm$ 2.5                    | 8.6 $\pm$ 1.3                        | 8.5 $\pm$ 1.6   | 344.8             | 0.99 |
|                        | HR-Q3                            | 7.1 $\pm$ 1.8                    | 5.8 $\pm$ 3.1                        | 5.8 $\pm$ 1.6   | 140.8             | 0.99 |
|                        | <i>Mean (<math>\pm</math>SD)</i> | 7.3 $\pm$ 1.1                    | 6.7 $\pm$ 1.3                        | 6.4 $\pm$ 1.4   | 422.3 $\pm$ 292.6 | 0.99 |
